# Supplementary material for: The Predictive Value of the Cervical Consistency Index to Predict Spontaneous Preterm Birth in Asymptomatic Twin Pregnancies at the Second-Trimester Ultrasound Scan: A Prospective Cohort Study
Source: MDPI journal article supplement (doi:10.3390/jcm9061784), 2020-06-08
Supplement: s1 [file s1]

## Supplementary material

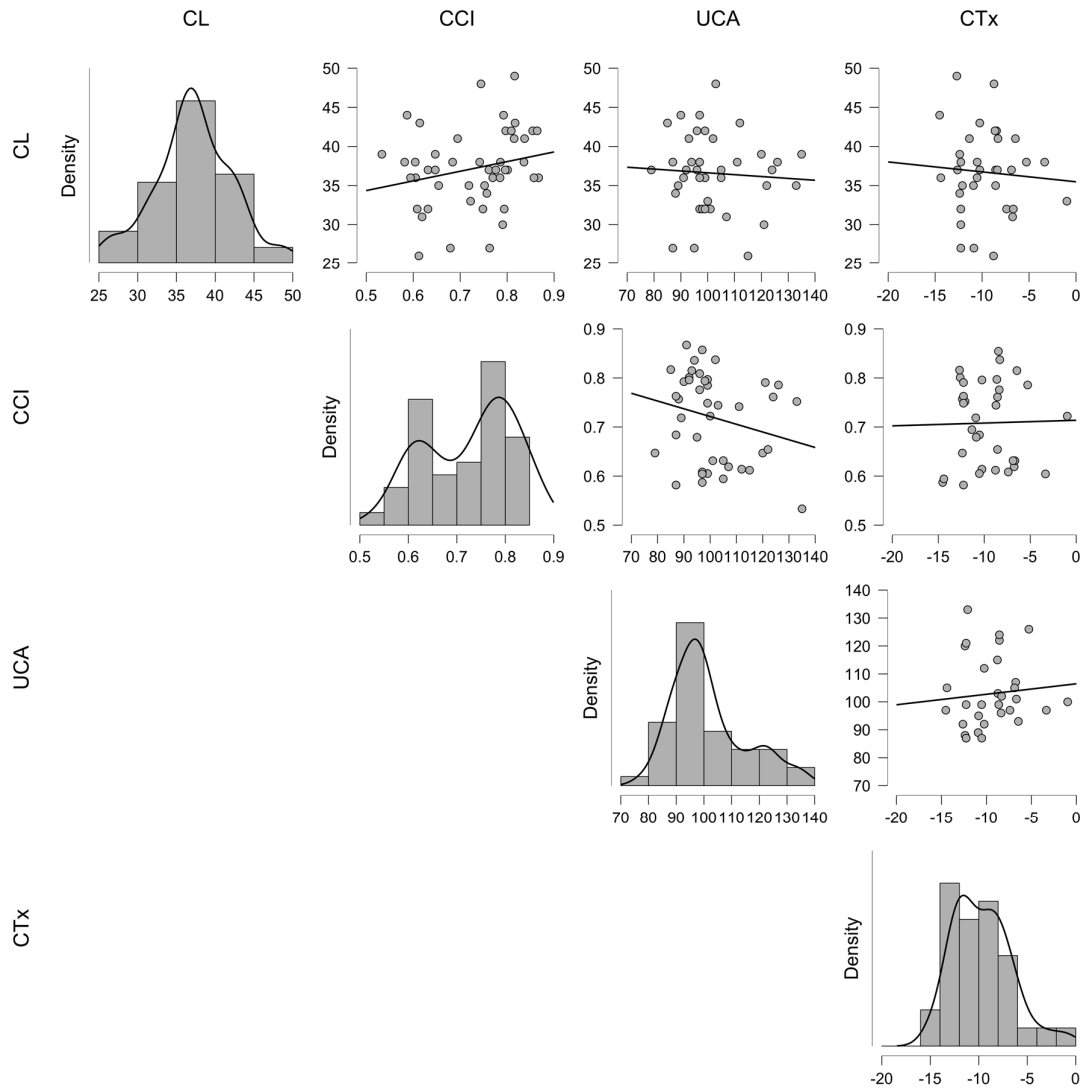

**Figure S1.** Distribution plots with density line indicated of the ultrasound derived markers at mid trimester with correlation plots between respective markers. Abbreviations: CL, cervical length; CCI, cervical consistency index; UCA, utero-cervical angle; CTx, cervical texture.

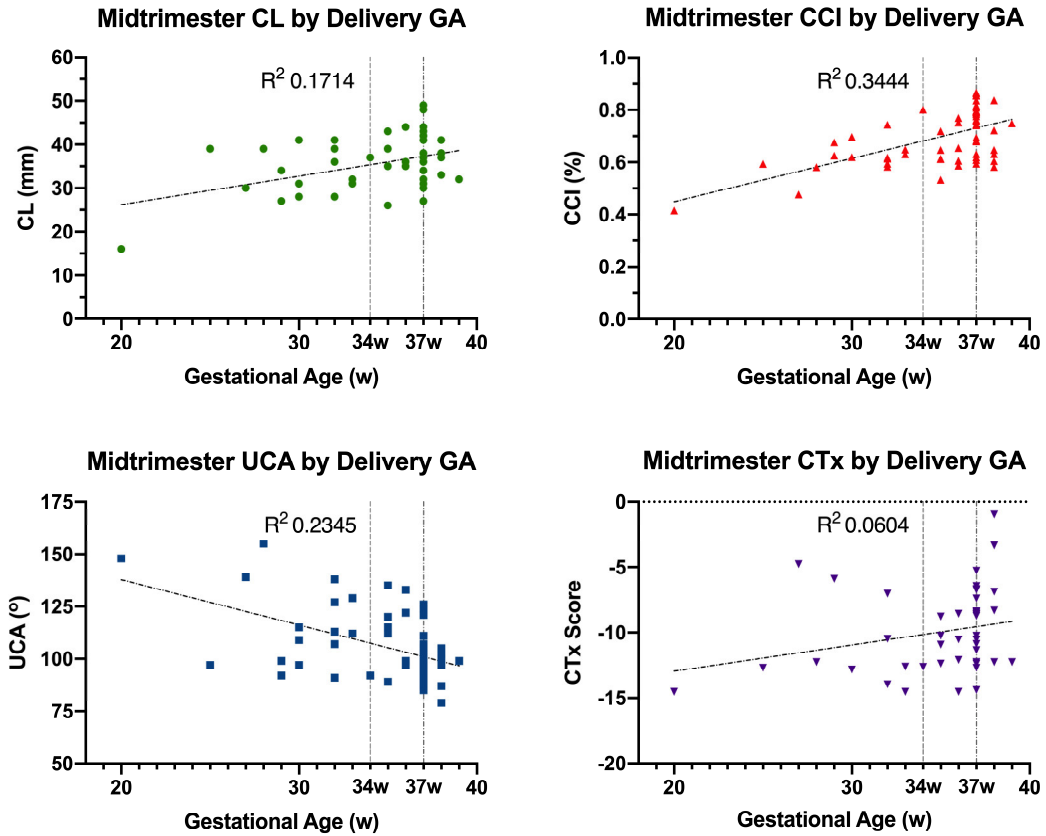

**Figure S2.** Plot of the ultrasound derived markers at mid trimester against the gestational age at delivery. Goodness-of-fit indicated by  $R^2$  values. Abbreviations: CL, cervical length; CCI, cervical consistency index; UCA, utero-cervical angle; CTx, cervical texture.
